# Supplementary material for: Changes in Treg and Breg cells in a healthy pediatric population
Source: PubMed Central journal article supplement (PMC10704817; doi:10.3389/fimmu.2023.1283981), 2023-11-21

**Title: Changes in Treg and Breg cells in a healthy pediatric population**

**Supplementary Material**

Supplementary Figure 1. Regulatory T cell (Treg) immunophenotyping gating strategy. A) Extracellular panel:  $CD4^+CD25^{hi}CD127^{low}$ , naïve Treg ( $CD4^+CD25^{hi}CD127^{low}CD45RO^-CCR4^-$ ), memory Treg ( $CD4^+CD25^{hi}CD127^{low}CD45RO^+CCR4^+$ ) and activated effector Treg ( $CD4^+CD25^{hi}CD127^{low}CD45RO^+CCR4^+HLA-DR^+$ ). B) Intracellular panels:  $CD4^+CD25^{hi}CD127^{low}Foxp3^+$ , and  $CD4^+CD25^{hi}FoxP3^+$ .

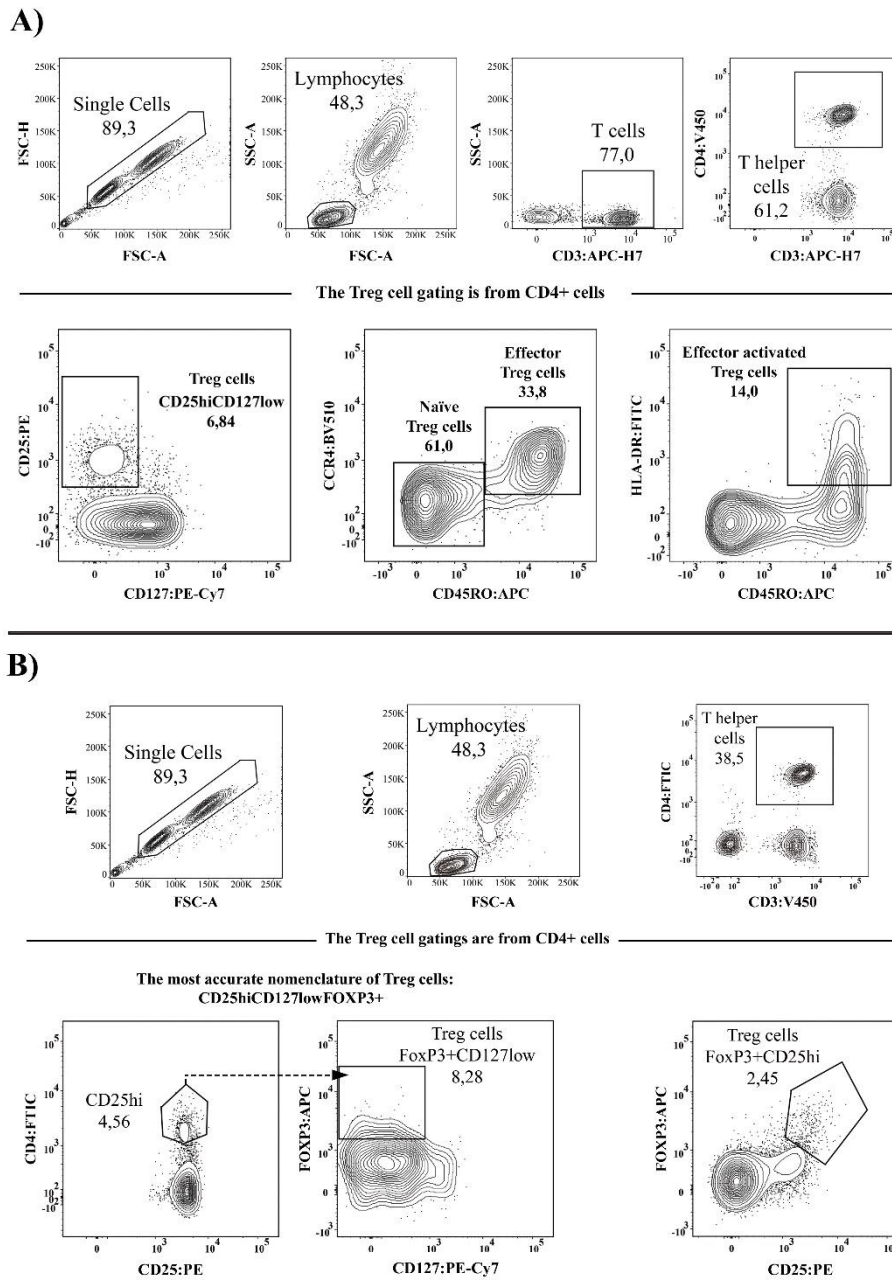

**Supplementary Figure 2. Regulatory B cell (Breg) immunophenotyping gating strategy.** Transitional Breg is defined as  $CD19^+CD24^{hi}CD38^{hi}$  and memory Breg cell as  $CD19^+CD24^{hi}CD27^+$ .

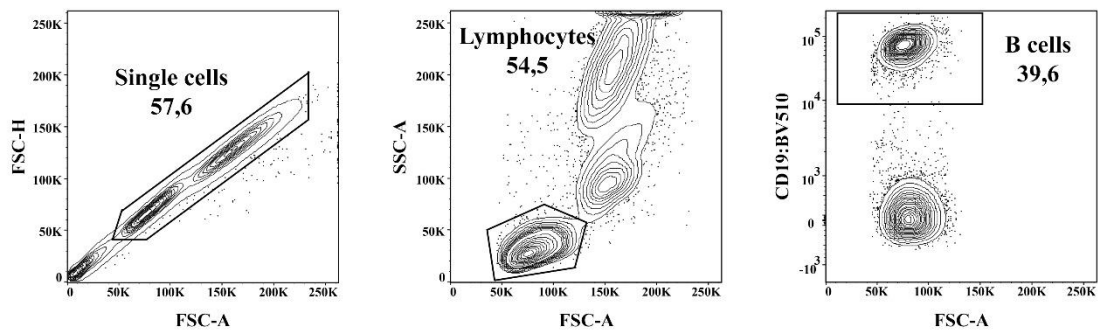

The Breg cell gating is from B cells

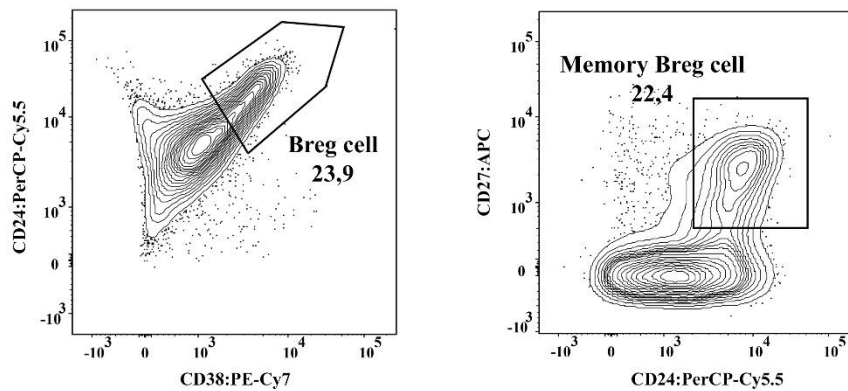

**Supplementary Figure 3. Correlation between gating strategies of regulatory T cell (Treg) and CD4<sup>+</sup>CD25<sup>hi</sup> by age.** The three Treg definitions are CD4<sup>+</sup>CD25<sup>hi</sup>CD127<sup>low</sup>, CD4<sup>+</sup>CD25<sup>hi</sup>CD127<sup>low</sup>Foxp3<sup>+</sup>, and CD4<sup>+</sup>CD25<sup>hi</sup>FoxP3<sup>+</sup>. The correlation between the three Treg definitions was moderate-strong for most of age ranges, being especially strong between the intracellular panels, and CD4<sup>+</sup>CD25<sup>hi</sup> vs CD4<sup>+</sup>CD25<sup>hi</sup>CD127<sup>low</sup>. The values inside the boxes indicate the Spearman correlation strength. Low association 0.1-0.3; moderate positive association between 0.3-0.5; and strong positive association 0.5-1. (\*) p value ≤ 0.05; (\*\*) p value ≤ 0.01.

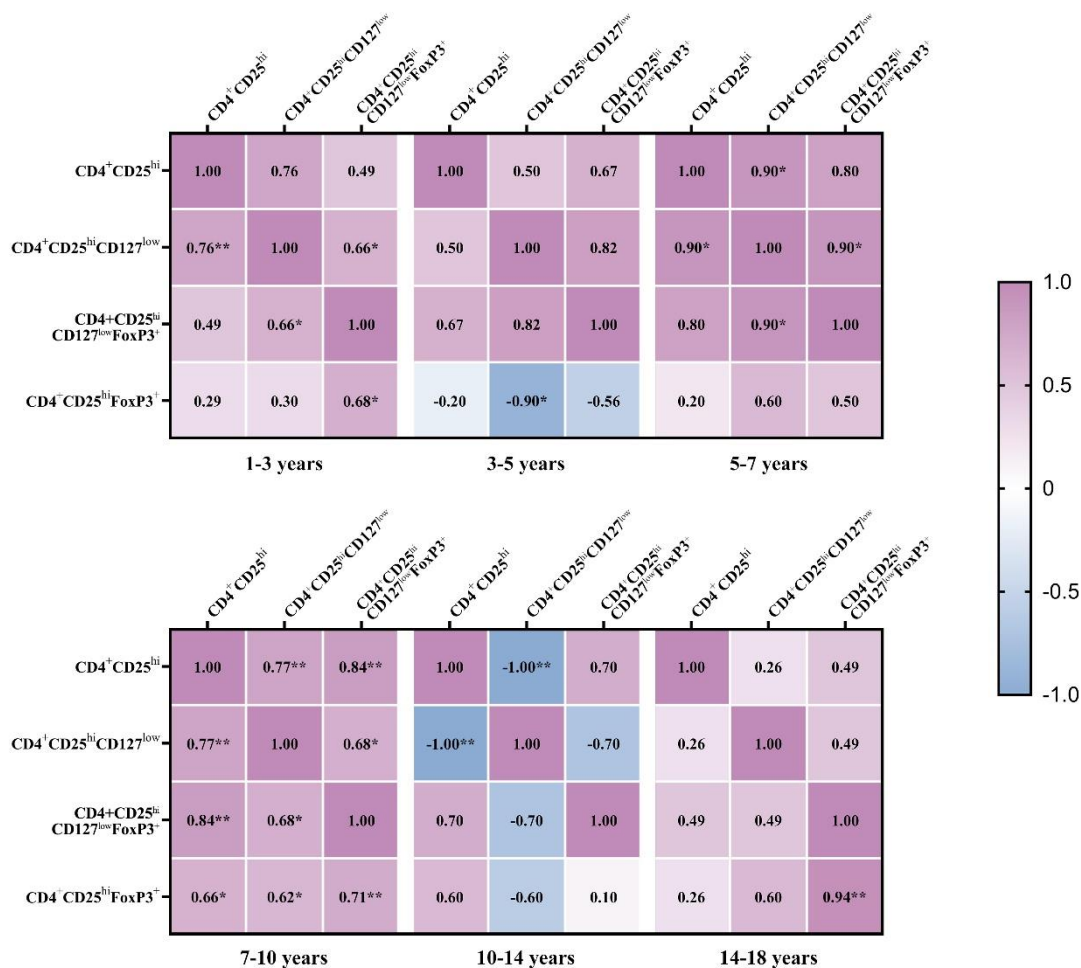

**Supplementary Figure 4. Frequency of regulatory T cell (Treg) by age range. A), B), C) and D) Total Treg (median/%) decreases mainly after 7 years onwards. E) Decrease of naïve Treg ( $CD4^+CD25^{hi}CD127^{low}CD45RO^-CCR4^-$ ) with age. F) Increase of effector Treg ( $CD4^+CD25^{hi}CD127^{low}CD45RO^+CCR4^+$ ) with age. G) Increment of effector activated Treg ( $CD4^+CD25^{hi}CD127^{low}CD45RO^+CCR4^+HLA-DR^+$ ) between 3-7 years. E), F) and G) suggest a process of maturation of Treg with age. The frequency of CD25,  $CD25^{hi}CD127^{low}$ ,  $CD25^{hi}CD127^{low}FoxP3^+$  and  $CD25^{hi}FoxP3^+$  are calculated from the  $CD4^+$  cells. The naïve and effector Treg are from  $CD25^{hi}CD127^{low}$ . (\*) p value  $\leq 0.05$ ; (\*\*) p value  $\leq 0.01$ . Discontinuous line: quartiles; Black solid line: median.**

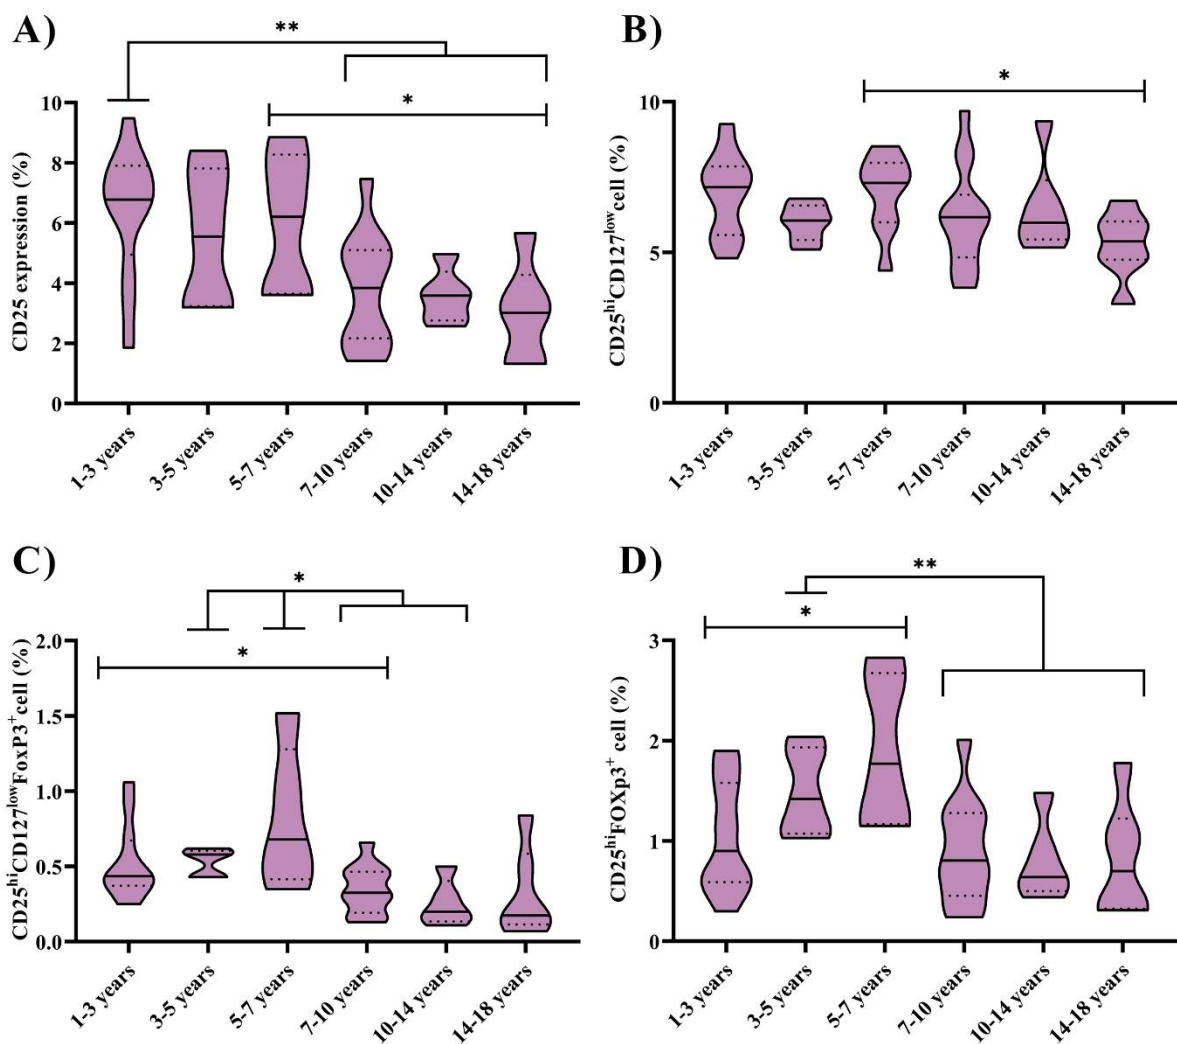

(continued on next page)

(continued)

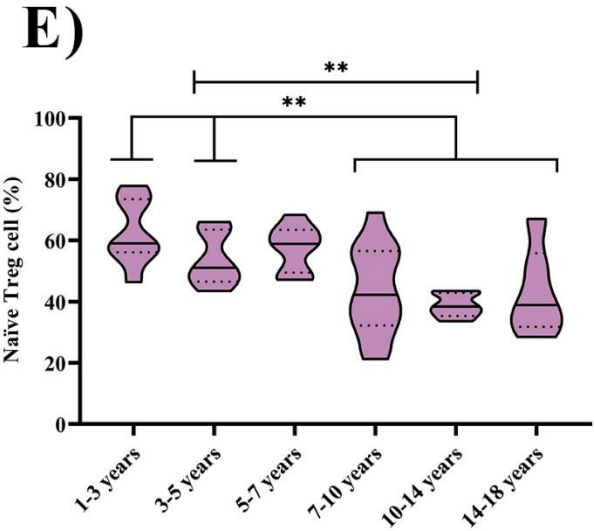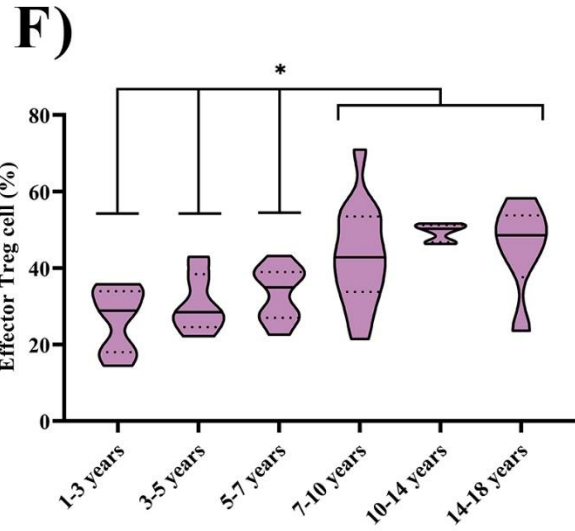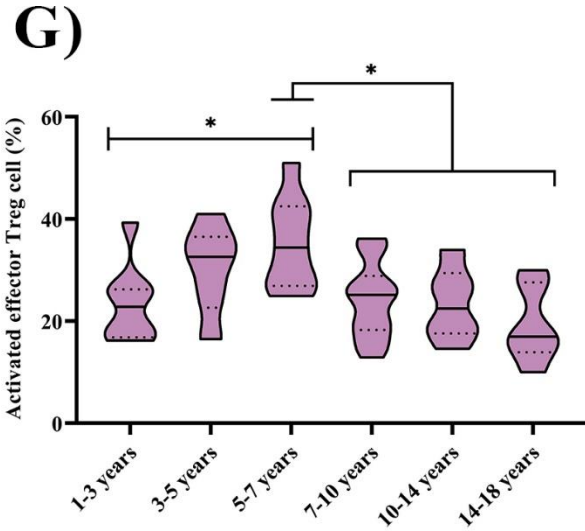

**Supplementary Figure 5. Frequency of regulatory B cell (Breg) by age range. A)** The total Breg (CD19<sup>+</sup>CD24<sup>hi</sup>CD38<sup>hi</sup>) (median/%) decrease mainly after 3 years onwards. **B)** Increment of memory Breg (CD19<sup>+</sup>CD24<sup>hi</sup>CD27<sup>+</sup>) frequency with age. The frequency of both Breg and memory Breg was calculated from CD19<sup>+</sup>. (\*) p value  $\leq 0.05$ ; (\*\*) p value  $\leq 0.01$ . Discontinuous line: quartiles; Black solid line: median.

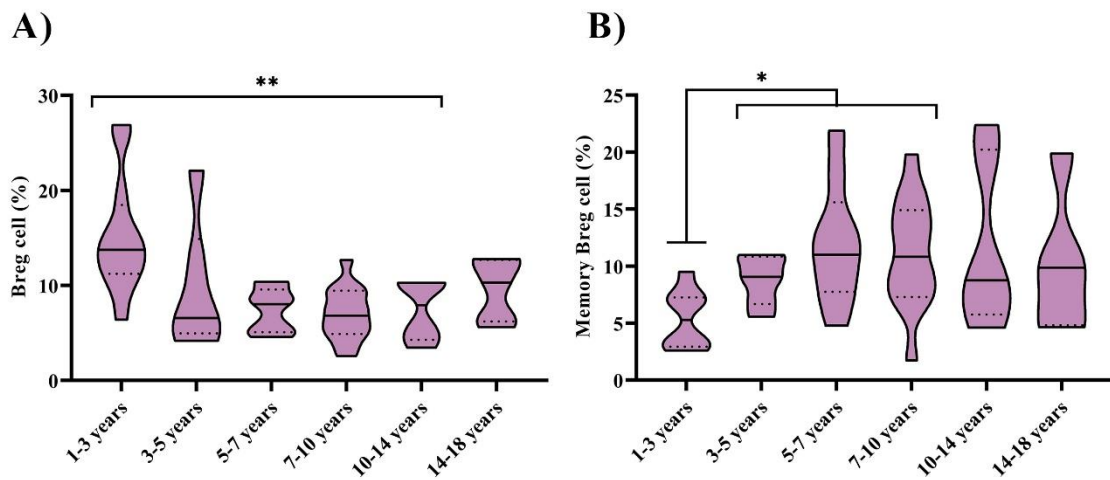

Supplement: DataSheet_1.pdf [file DataSheet_1.pdf]
